# Supplementary material
Source: MDPI journal article supplement (https://www.mdpi.com/2073-4344/11/10/1205)
Supplement: s1 [file s1]

# Mesoporous TiO<sub>2</sub> implanted ZnO QDs for the photodegradation of tetracycline: Material Design, Structural Characterization and Photodegradation Mechanism

Anwar Iqbal<sup>1\*</sup>, Usman Saidu<sup>1</sup>, S. Sreekantan<sup>2\*</sup>, M. Norazmi Ahmad<sup>3</sup>, M. Rashid<sup>4</sup>, Naser M. Ahmed<sup>4</sup>  
W. H. Danial<sup>5</sup> and Lee D. Wilson<sup>6,\*</sup>

1 School of Chemical Sciences, Universiti Sains Malaysia, Penang 11800, Malaysia;  
[anwariqbal@usm.my](mailto:anwariqbal@usm.my); [usmanivyva2000@gmail.com](mailto:usmanivyva2000@gmail.com)

2 School of Materials & Mineral Resources Engineering, Universiti Sains Malaysia  
Engineering Campus, 14300 Nibong Tebal, Seberang Perai Selatan, Pulau Pinang,  
Malaysia; [srimala@usm.my](mailto:srimala@usm.my)

3 Experimental and Theoretical Research Lab, Department of Chemistry, Kuliyah of  
Science, 25200 Kuantan, Pahang, Malaysia; [mnorazmi@iiu.edu.my](mailto:mnorazmi@iiu.edu.my)

4 School of Physics, Universiti Sains Malaysia, Penang 11800, Malaysia;  
[marzaini@usm.my](mailto:marzaini@usm.my); [naser@usm.my](mailto:naser@usm.my)

5 Department of Chemistry, Kuliyah of Science, International Islamic University  
Malaysia, 25200 Kuantan, Pahang, Malaysia; [whazman@iiu.edu.my](mailto:whazman@iiu.edu.my)

6 Department of Chemistry, University of Saskatchewan, 110 Science Place–Room 165  
Thorvaldson Building, Saskatoon, SK. Canada S7N 5C9; [lee.wilson@usask.ca](mailto:lee.wilson@usask.ca)

\* Correspondence: [anwariqbal@usm.my\(A.I.\)](mailto:anwariqbal@usm.my(A.I.)), [srimala@usm.my](mailto:srimala@usm.my) (S.S);  
[lee.wilson@usask.ca](mailto:lee.wilson@usask.ca) (L.D.W.)

Tel.: +60-4653-3565 (A.I.); +60-599 5255 (S.S.); +1-306-966-2961 (L.D.W.)

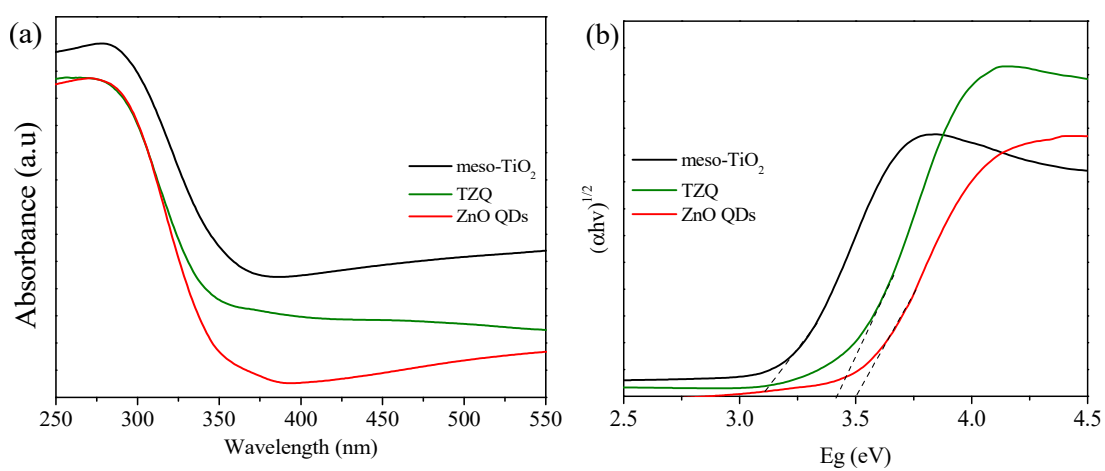

**Figure S1.** UV-Vis absorbance spectra (a) and (b) the corresponding Tauc's plot of  $(\alpha h\nu)^{1/2}$  versus  $E_g$  (eV) of meso-TiO<sub>2</sub>, TZQ and ZnO QDs.

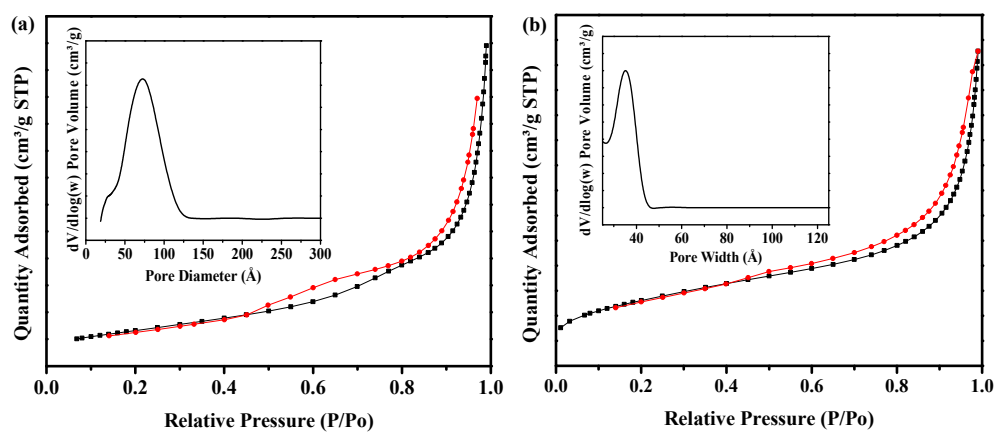

**Figure S2.** N<sub>2</sub> sorption isotherms and (inset: BJH pore size distribution) of (a) meso-TiO<sub>2</sub> and (b) TZQ.

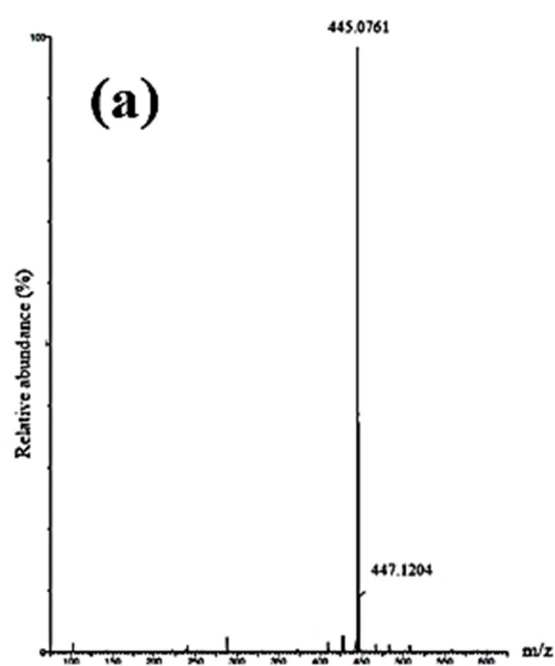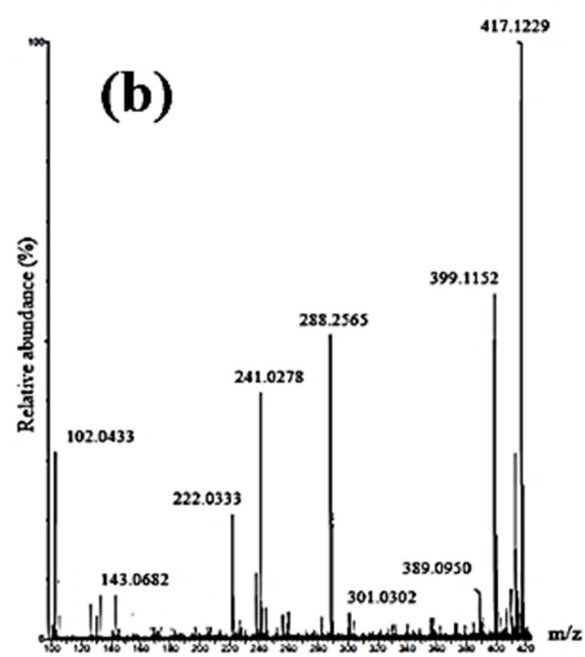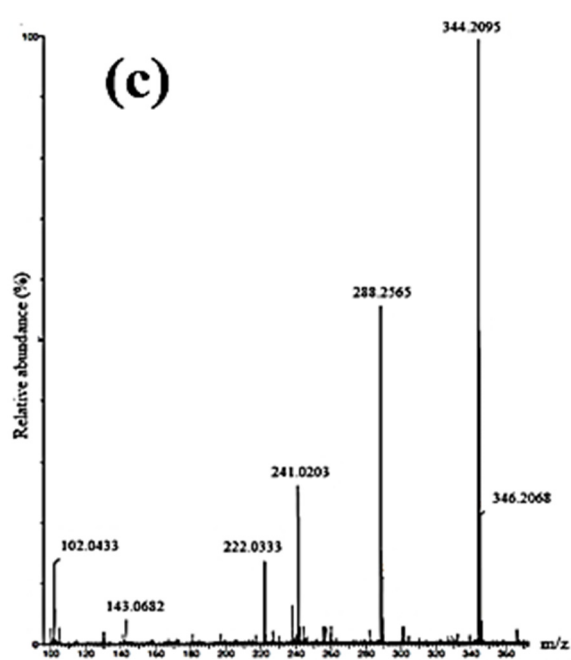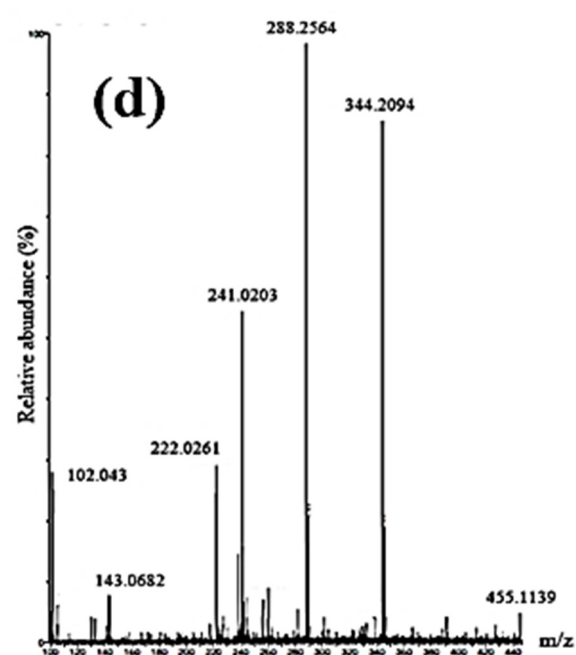

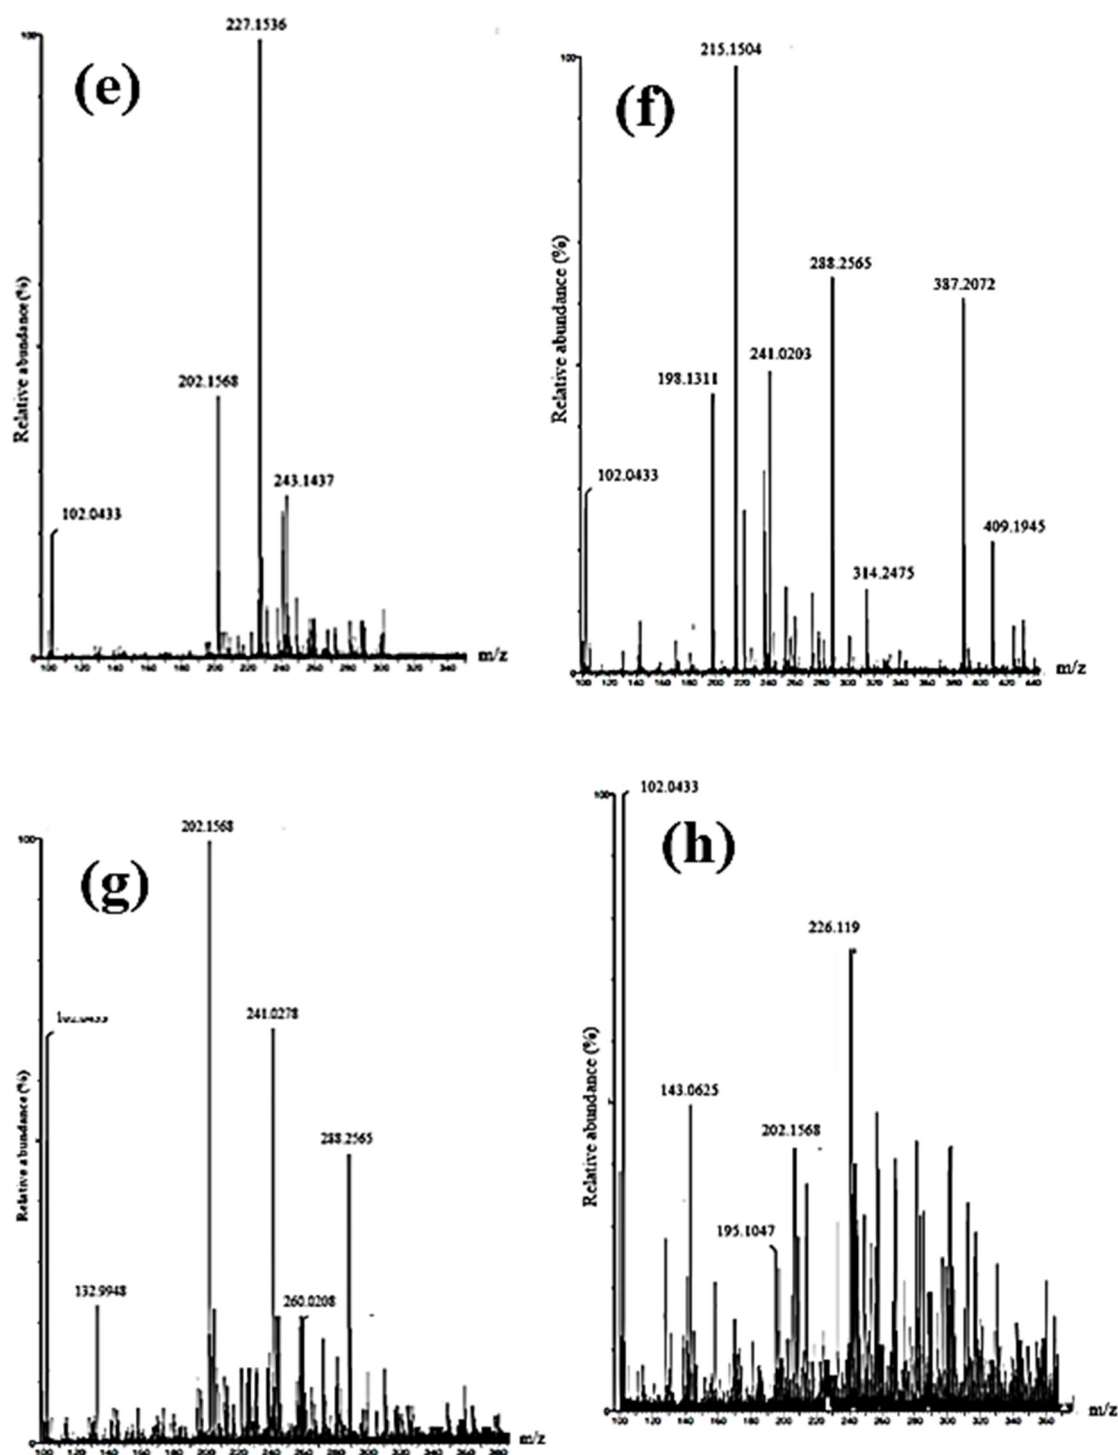

**Figure S3.** (a) Mass spectra of TC (a) and its intermediates during photodegradation in the presence of TZQ (b-h).

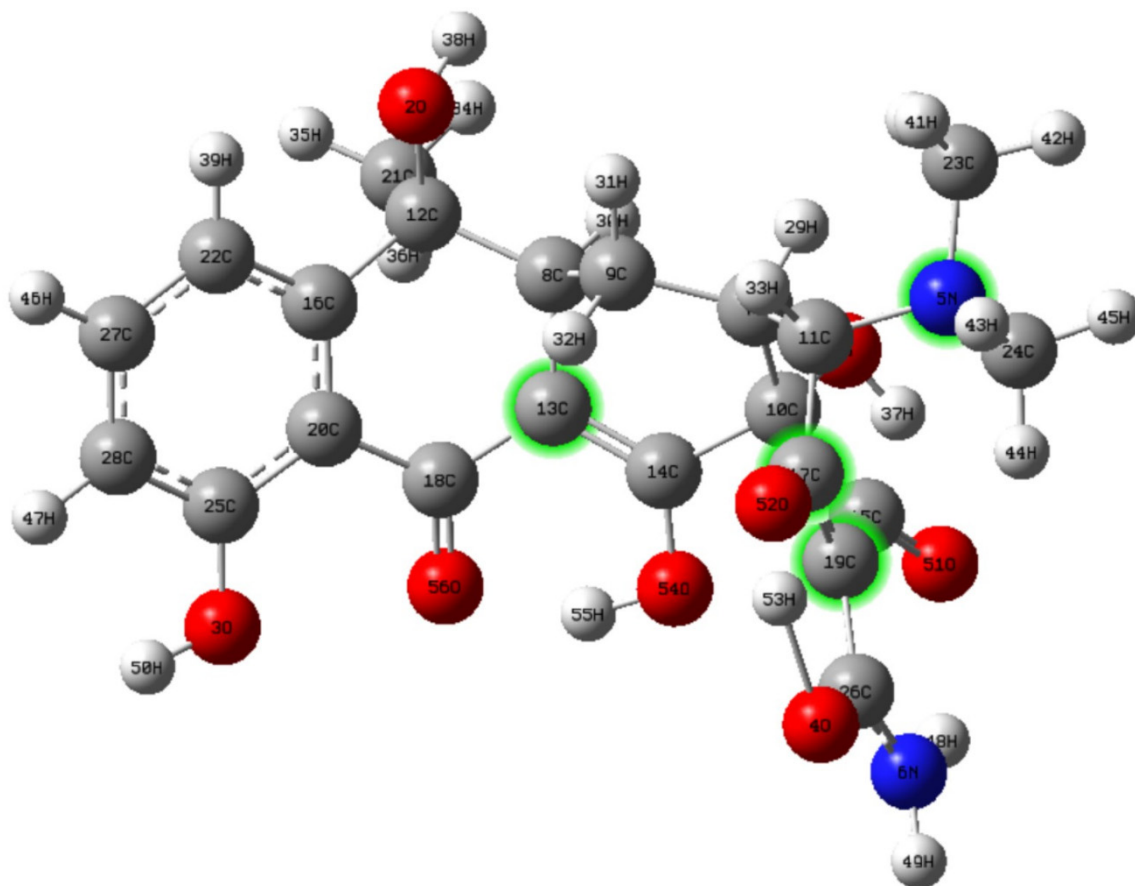

**Figure S4.** The chemical structure of TC and its distribution of Fukui index ( $fk^0$ ) for the radical attack.

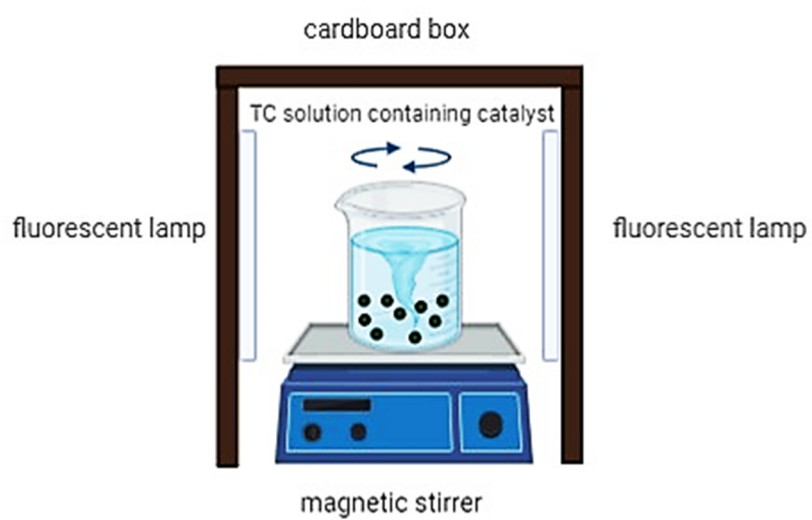

**Figure S5.** Schematic diagram of the photocatalytic degradation reaction system under fluorescent light irradiation.

**Table S1:** Fukui index of TC atoms.

| Atom | No | $fk^+$   | $fk^-$   | $fk^0$          |
|------|----|----------|----------|-----------------|
| O    | 1  | 0.01302  | 0.03504  | 0.01101         |
| O    | 2  | 0.00005  | -0.00011 | -0.00008        |
| O    | 3  | 0.00699  | 0.07101  | 0.03201         |
| O    | 4  | 0.00283  | 0.00251  | -0.00016        |
| N    | 5  | 0.00646  | 0.22230  | <b>0.10792</b>  |
| N    | 6  | -0.00307 | -0.00020 | 0.00143         |
| C    | 7  | -0.00878 | -0.00623 | 0.00127         |
| C    | 8  | 0.09551  | -0.06458 | -0.08004        |
| C    | 9  | -0.02203 | 0.09046  | 0.05624         |
| C    | 10 | 0.06009  | -0.01911 | -0.03960        |
| C    | 11 | -0.02839 | -0.00259 | 0.01290         |
| C    | 12 | 0.00466  | -0.00528 | -0.00497        |
| C    | 13 | -0.10071 | 0.29559  | <b>0.19815</b>  |
| C    | 14 | 0.18165  | 0.03418  | -0.07374        |
| C    | 15 | 0.03719  | 0.05134  | 0.00707         |
| C    | 16 | 0.06391  | -0.04382 | -0.05387        |
| C    | 17 | 0.21385  | 0.02030  | <b>-0.09678</b> |
| C    | 18 | -0.08307 | -0.04606 | 0.01850         |
| C    | 19 | 0.12869  | -0.04619 | <b>-0.08744</b> |
| C    | 20 | 0.00606  | 0.08430  | 0.03912         |
| C    | 21 | -0.00731 | 0.00315  | 0.00523         |
| C    | 22 | -0.06442 | 0.09605  | 0.08023         |
| C    | 23 | 0.00095  | -0.01374 | -0.00734        |
| C    | 24 | 0.00362  | -0.02318 | -0.01340        |
| C    | 25 | 0.09278  | 0.06958  | -0.01160        |
| C    | 26 | 0.03859  | -0.01387 | -0.02623        |
| C    | 27 | 0.16741  | 0.01530  | -0.07606        |
| C    | 28 | -0.03195 | 0.00262  | 0.01729         |
| H    | 29 | 0.00786  | -0.00457 | -0.00622        |
| H    | 30 | -0.00344 | 0.01414  | 0.00879         |
| H    | 31 | -0.00057 | 0.00583  | 0.00320         |
| H    | 32 | 0.00082  | -0.00196 | -0.00139        |
| H    | 33 | 0.00263  | 0.02741  | 0.01239         |



|   |    |          |          |          |
|---|----|----------|----------|----------|
| H | 34 | 0.00075  | -0.00066 | -0.00070 |
| H | 35 | -0.00109 | -0.00001 | 0.00054  |
| H | 36 | 0.00210  | -0.00064 | -0.00137 |
| H | 37 | -0.00099 | -0.00062 | 0.00018  |
| H | 38 | 0.00274  | 0.00001  | -0.00137 |
| H | 39 | 0.00395  | -0.00484 | -0.00439 |
| H | 40 | -0.00043 | 0.00281  | 0.00162  |
| H | 41 | 0.00042  | 0.02207  | 0.01083  |
| H | 42 | 0.00164  | 0.00222  | 0.00029  |
| H | 43 | 0.00013  | 0.02373  | 0.01180  |
| H | 44 | -0.00115 | 0.00322  | 0.00218  |
| H | 45 | 0.00104  | 0.00078  | -0.00013 |
| H | 46 | -0.01024 | -0.00143 | 0.00440  |
| H | 47 | 0.00113  | -0.00113 | -0.00113 |
| H | 48 | 0.00029  | 0.00017  | -0.00006 |
| H | 49 | 0.00460  | -0.00004 | -0.00232 |
| H | 50 | 0.00060  | -0.00245 | -0.00152 |
| O | 51 | 0.04504  | -0.00142 | -0.02323 |
| O | 52 | 0.02985  | 0.00278  | -0.01354 |
| H | 53 | -0.00101 | -0.00035 | 0.00033  |
| O | 54 | 0.04033  | 0.09192  | 0.02580  |
| H | 55 | -0.00328 | -0.00270 | 0.00029  |
| O | 56 | 0.10738  | 0.01699  | -0.04520 |
